# Supplementary material for: Genome-Wide Identification of ARF Transcription Factor Gene Family and Their Expression Analysis in Sweet Potato
Source: MDPI journal article supplement (doi:10.3390/ijms22179391), 2021-08-30
Supplement: s1 [file s1]

**Table S1.** The characteristics of identified ARF gene families in *I. trifida*

| Gene Name | Gene Symbol | CDS<br>length<br>(bp) | Domains          | Deduced protein |          |      | Chr | Genome location     | Exon<br>Number |
|-----------|-------------|-----------------------|------------------|-----------------|----------|------|-----|---------------------|----------------|
|           |             |                       |                  | Length (aa)     | MW (kDa) | PI   |     |                     |                |
| ItfARF1a  | itf09g04490 | 1977                  | B3, ARF, AUX/IAA | 658             | 73.862   | 5.86 | 9   | 2229243 - 2223211   | 14             |
| ItfARF1b  | itf10g21760 | 1980                  | B3, ARF, AUX/IAA | 659             | 74.102   | 5.97 | 10  | 22768345 - 22773913 | 14             |
| ItfARF2a  | itf06g08230 | 2652                  | B3, ARF, AUX/IAA | 884             | 98.724   | 6.72 | 6   | 10610618 - 10605949 | 7              |
| ItfARF2b  | itf10g13730 | 2559                  | B3, ARF, AUX/IAA | 852             | 94.263   | 6.38 | 10  | 16445652 - 16440359 | 14             |
| ItfARF2c  | itf11g10870 | 2556                  | B3, ARF, AUX/IAA | 851             | 94.731   | 6.09 | 11  | 6559617 - 6564877   | 14             |
| ItfARF3a  | itf09g07030 | 2169                  | B3, ARF          | 722             | 79.299   | 6.57 | 9   | 3677006 - 3671593   | 10             |
| ItfARF3b  | itf10g19820 | 1998                  | B3, ARF          | 665             | 73.034   | 7.72 | 10  | 21532579 - 21536723 | 10             |
| ItfARF4a  | itf04g30540 | 2466                  | B3, ARF, AUX/IAA | 821             | 90.894   | 6.75 | 4   | 29721501 - 29715473 | 12             |
| ItfARF4b  | itf07g11450 | 2412                  | B3, ARF, AUX/IAA | 803             | 89.081   | 5.56 | 7   | 9997889 - 9991527   | 12             |
| ItfARF5   | itf01g35200 | 2844                  | B3, ARF, AUX/IAA | 947             | 105.019  | 5.2  | 1   | 31640623 - 31635815 | 13             |
| ItfARF6a  | itf06g20390 | 2853                  | B3, ARF, AUX/IAA | 950             | 105.591  | 6.33 | 6   | 22207636 - 22201198 | 14             |
| ItfARF6b  | itf10g04850 | 2706                  | B3, ARF, AUX/IAA | 901             | 99.541   | 6.01 | 10  | 4527118 - 4520349   | 14             |
| ItfARF8a  | itf03g05320 | 2442                  | B3, ARF, AUX/IAA | 813             | 90.204   | 5.62 | 3   | 3300707 - 3306419   | 14             |
| ItfARF8b  | itf05g23120 | 2538                  | B3, ARF, AUX/IAA | 845             | 93.964   | 5.82 | 5   | 23445845 - 23452495 | 14             |
| ItfARF9a  | itf10g16260 | 1938                  | B3, ARF, AUX/IAA | 645             | 72.391   | 6.69 | 10  | 18600817 - 18605381 | 14             |
| ItfARF9b  | itf12g17310 | 1959                  | B3, ARF, AUX/IAA | 652             | 73.094   | 6.31 | 12  | 16906880 - 16902499 | 14             |
| ItfARF10a | itf04g30820 | 2115                  | B3, ARF, AUX/IAA | 704             | 77.748   | 7.83 | 4   | 29891980 - 29887654 | 4              |
| ItfARF10b | itf07g11640 | 2040                  | B3, ARF, AUX/IAA | 679             | 74.738   | 7.56 | 7   | 10271997 - 10268425 | 4              |
| ItfARF11  | itf02g08750 | 1731                  | B3, ARF          | 576             | 64.539   | 4.99 | 2   | 8156302 - 8152920   | 11             |
| ItfARF16a | itf02g08580 | 2043                  | B3, ARF, AUX/IAA | 680             | 75.246   | 6.53 | 2   | 8048900 - 8051867   | 3              |
| ItfARF16b | itf04g06590 | 2076                  | B3, ARF, AUX/IAA | 691             | 75.873   | 6.56 | 4   | 3914771 - 3910977   | 3              |
| ItfARF16c | itf06g19540 | 2031                  | B3, ARF          | 676             | 74.815   | 5.75 | 6   | 21612765 - 21615756 | 2              |
| ItfARF18  | itf15g10150 | 2070                  | B3, ARF, AUX/IAA | 689             | 76.415   | 6.22 | 15  | 6848850 - 6843635   | 14             |
| ItfARF19a | itf01g29370 | 3375                  | B3, ARF, AUX/IAA | 1124            | 124.164  | 6.62 | 1   | 27916897 - 27923035 | 14             |
| ItfARF19b | itf02g07020 | 3180                  | B3, ARF, AUX/IAA | 1059            | 117.923  | 6.05 | 2   | 7111545 - 7105401   | 13             |
